# Supplementary material for: Assembly of Zn-metal organic frameworks based on a N-rich ligand: selective sorption for CO2 and luminescence sensing of nitro explosives
Source: Royal Society of Chemistry journal article supplement (doi:10.1039/c5ra05945c), 2015-01-01
Supplement: c5ra05945c1.pdf [file c5ra05945c1.pdf]

## Supporting information

**Assembly of Zn-metal organic frameworks based on N-rich ligand:  
selective sorption for CO<sub>2</sub> and luminescence sensing of nitro  
explosives**

**Xiao-Li Hu, Chao Qin,\* Liang Zhao, Fu-Hong Liu, Kui-Zhan Shao and Zhong-Min Su\***

Institute of Functional Material Chemistry; Faculty of Chemistry, Northeast Normal University,  
Changchun, 130024, People's Republic of China; E-mail: qinc703@nenu.edu.cn;  
zmsu@nenu.edu.cn.

## **S1. Materials and measurements**

All chemical materials were purchased from commercial sources and used without further purification. The FT-IR spectra were recorded from KBr pellets in the range 4000–400 cm<sup>-1</sup> on a Mattson Alpha-Centauri spectrometer. XRPD patterns were recorded on a Siemens D5005 diffractometer with Cu K $\alpha$  ( $\lambda$  = 1.5418 Å) radiation in the range of 3–60° at a rate of 5°/min. The UV-Vis absorption spectra were examined on a Shimadzu UV-2550 spectrophotometer in the wavelength range of 200–800 nm. The C, H, and N elemental analyses were conducted on a Perkin-Elmer 2400CHN elemental analyzer. TG curves were performed on a Perkin-Elmer TG-7 analyzer heated from room temperature to 1000 °C at a ramp rate of 5 °C/min under nitrogen. The photoluminescence spectra were measured on a Perkin-Elmer FLS-920 Edinburgh Fluorescence Spectrometer.

## **S2. X-ray crystallography**

Single-crystal X-ray diffraction data for **1–2** were recorded by using a Bruker Apex CCD diffractometer with graphite-monochromated Mo-K $\alpha$  radiation ( $\lambda$  = 0.71069 Å) at 293 K. Absorption corrections were applied by using a multi-scan technique. All the structures were solved by Direct Method of SHELXS-97 and refined by full-matrix least-squares techniques using the SHELXL-97 program within WINGX. Non-hydrogen atoms were refined with anisotropic temperature parameters.

The Selected bond lengths [Å] and angles [°] for **1–2** are summarized in Table S1 and Table S2.

## **S3. Gas sorption experiments**

The N<sub>2</sub> and CO<sub>2</sub> sorption measurements were performed on automatic volumetric adsorption equipment (Belsorp mini II). Before gas adsorption measurements, the samples were immersed in CH<sub>2</sub>Cl<sub>2</sub> for 24 h, and the extracts were decanted. Fresh CH<sub>2</sub>Cl<sub>2</sub> was subsequently added, and the crystals were allowed to stay for an additional 24 h to remove the nonvolatile solvates (DMA). After the removal of dichloromethane by decanting, the samples were activated by drying under a dynamic vacuum at room temperature overnight. Before the measurement, the samples were dried again by using the ‘outgas’ function of the surface area analyzer for 12 h at 90 °C.

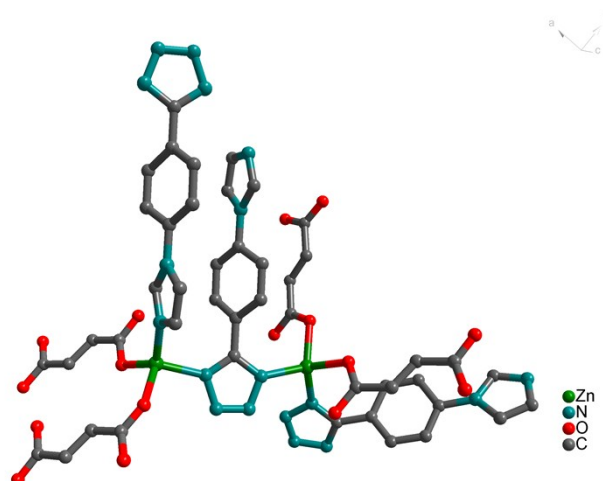

**Fig. S1** The representations of 1D chain of compound **1** along the *c* axis.

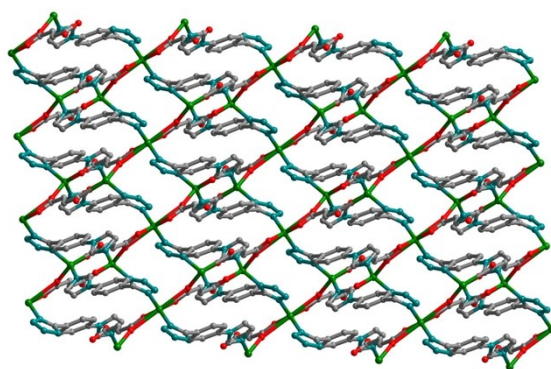

**Fig. S2** The view of the 3D framework of compound **1** along *b* axis.

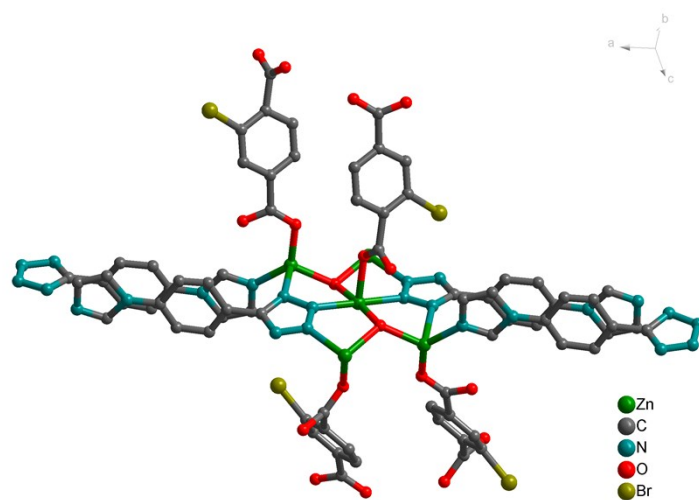

**Fig. S3** View of the coordination environment around Zn(II) and the building unit in framework **2**.

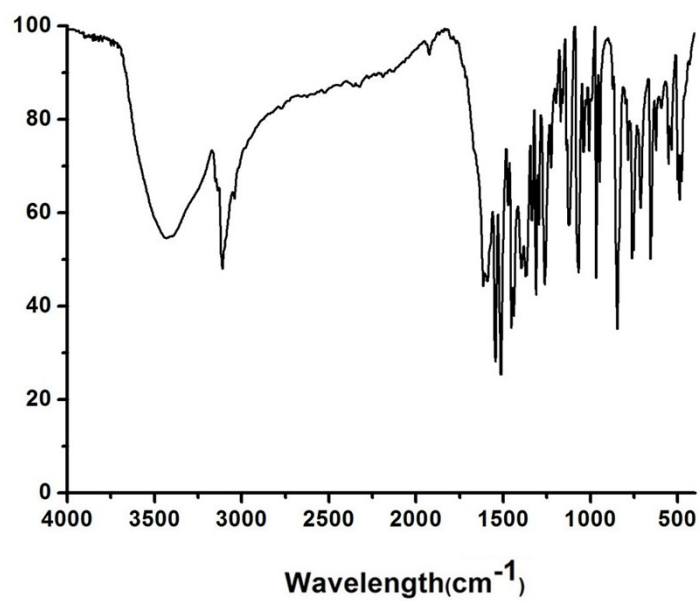

**Fig. S4** FT-IR spectra of **1**.

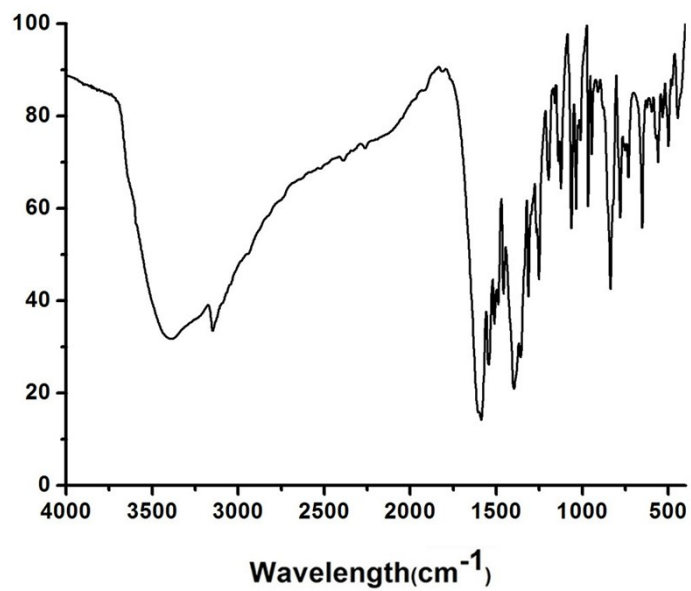

**Fig. S5** FT-IR spectra of **2**.

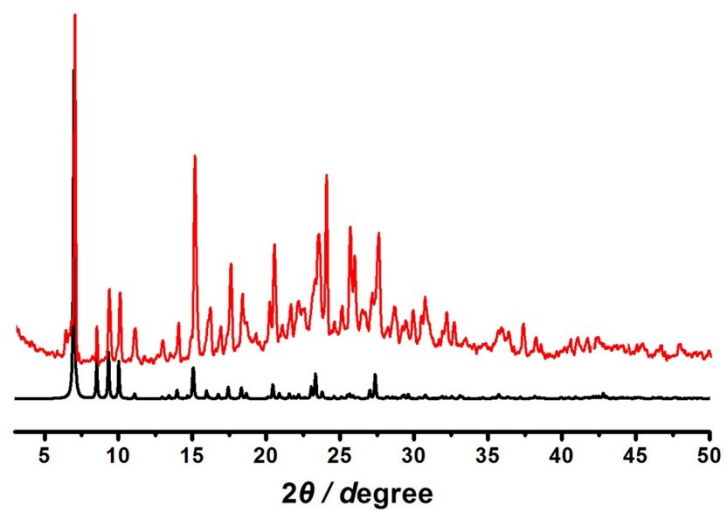

**Fig. S6** X-ray powder diffraction patterns of **1**: simulated (black) and as-synthesized (red).

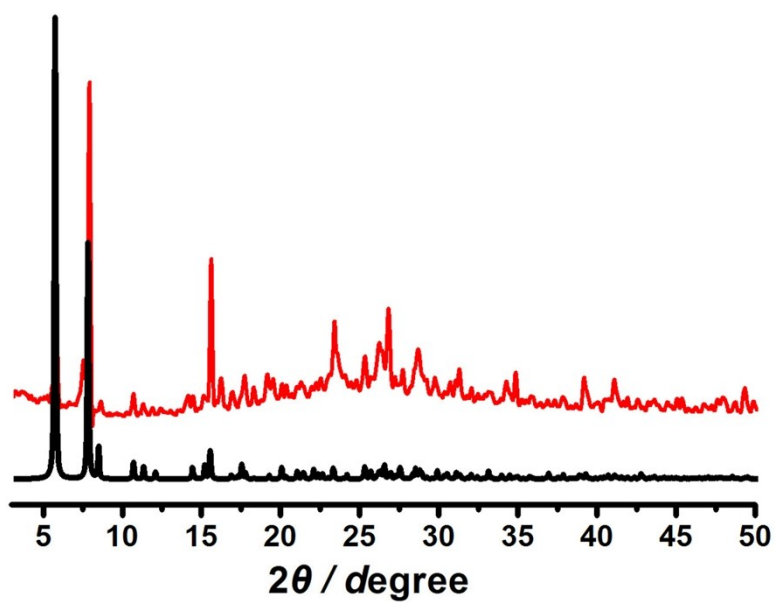

**Fig. S7** X-ray powder diffraction patterns of **2**: simulated (black) and as-synthesized (red).

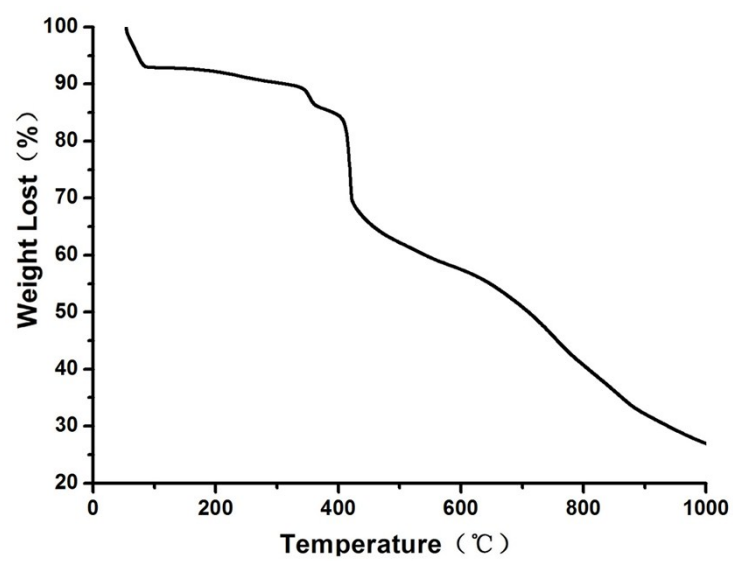

**Fig. S8** TG curves of compound 1.

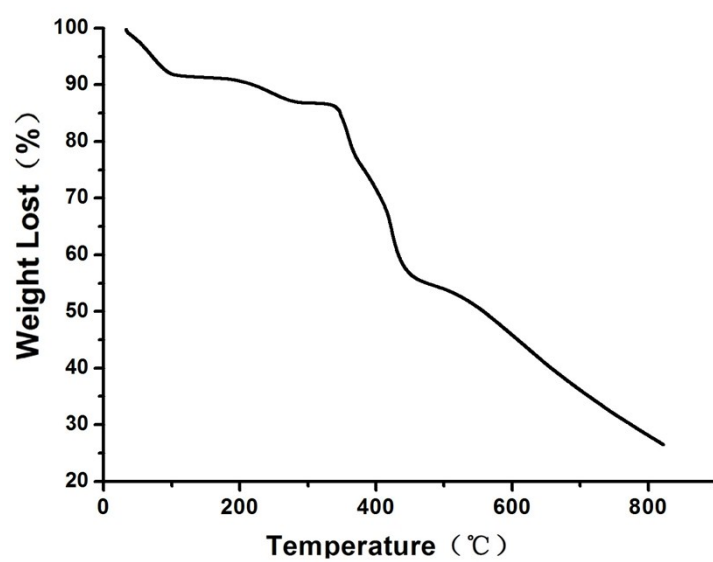

**Fig. S9** TG curves of compound 2.

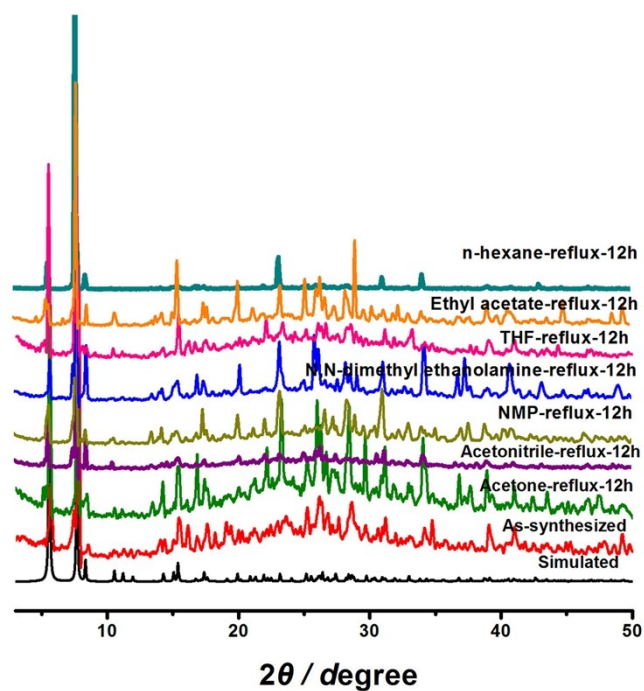

**Fig. S10** X-ray powder diffraction patterns of **2**: simulated (black), as-synthesized (red), acetone (green), after soaking in acetonitrile (purple), NMP (dark yellow), N,N-dimethyl ethanolamine (blue), THF (pink), ethyl acetate (orange) and n-hexane (dark cyan).

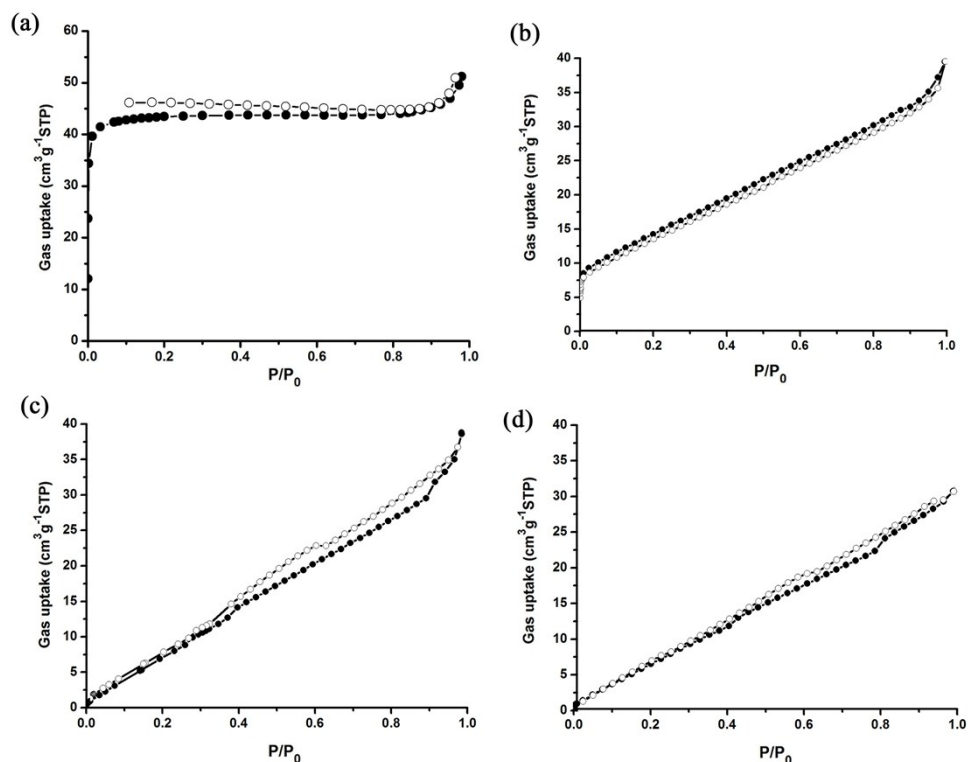

**Fig. S11** (a) The nitrogen sorption isotherms of **1a** at 77 K, after (b) water, (c) HCl (0.005 M) and (d) NaOH (0.005 M) treatment.

#### S4. Heat of adsorption calculation for gas uptake

1. The isosteric heat of adsorption values were calculated using the Clausius–Clapeyron equation:

$$\ln(P_1/P_2) = \Delta H_{\text{abs}} \times (T_2 - T_1) / R T_1 T_2 \quad (1)$$

Where  $P_i$  = pressure for isotherm i

$T_i$  = temperature for isotherm i

$$R = 8.315 \text{ J / (K}^{\circ}\text{mol)}$$

The equation can be applied to calculate the enthalpy of adsorption of a gas as a function of the quantity of gas adsorbed.

2. The isosteric heat of adsorption values were calculated using the virial equation (1):

$$\ln(p) = \ln(n) + (a_0 + a_1 \times n + a_2 \times n^2) + b \quad (1)$$

where p is pressure, n is amount adsorbed, T is temperature, and  $a_0$ ,  $a_1$ ,  $a_2$  and  $b_1$  are temperature independent empirical parameters. The isosteric heat of adsorption was estimated from the following equation (2) as a function of methane uptake.

$$Q_{\text{st}} = -R \times (a_0 + a_1 \times n + a_2 \times n^2) \quad (2)$$

**Table S1.** Virial fit parameters for **1**.

| Equation $y = \ln(x) + 1/k \times (a_0 + a_1 \times x + a_2 \times x^2 + a_3 \times x^3 + a_4 \times x^4 + a_5 \times x^5) + (b_0 + b_1 \times x + b_2 \times x^2)$ |             |                |
|---------------------------------------------------------------------------------------------------------------------------------------------------------------------|-------------|----------------|
| Adj. R-Square                                                                                                                                                       | 0.96902     |                |
|                                                                                                                                                                     | Value       | Standard Error |
| $a_0$                                                                                                                                                               | -4267.89431 | 578.97046      |
| $a_1$                                                                                                                                                               | -1.16255    | 24.48297       |
| $a_2$                                                                                                                                                               | 0.76692     | 0.49691        |
| $a_3$                                                                                                                                                               | -0.01297    | 0.00967        |
| $a_4$                                                                                                                                                               | 7.24221E-5  | 5.9139E-5      |
| $a_5$                                                                                                                                                               | 0           | 0              |
| $b_0$                                                                                                                                                               | 17.21349    | 2.06577        |
| $b_1$                                                                                                                                                               | -0.04601    | 0.08831        |
| $b_2$                                                                                                                                                               | 0           | 0              |



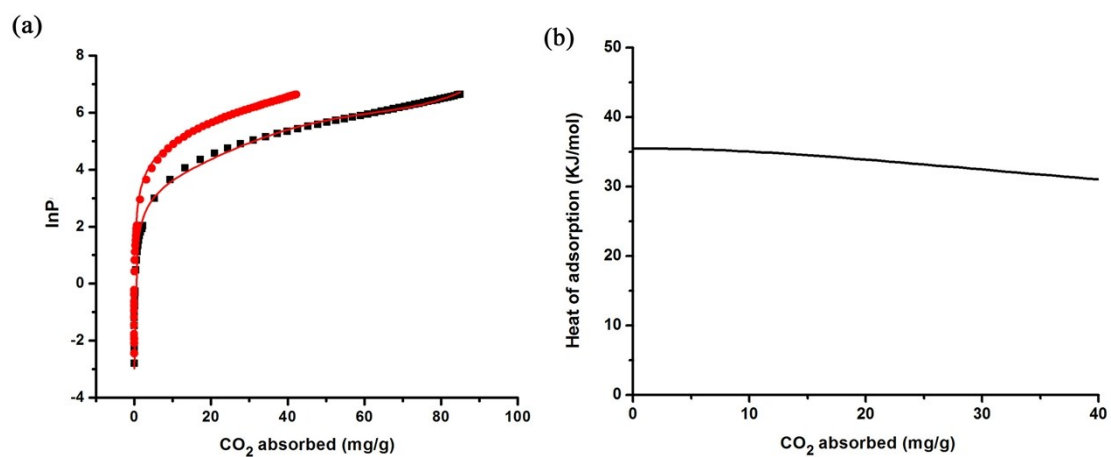

**Fig. S12** (a) Virial analysis of the sorption data for **1** (square, black: 273 K, circle, red: 298 K). (b) Heats of adsorption for CO<sub>2</sub> of **1** estimated by virial equation.

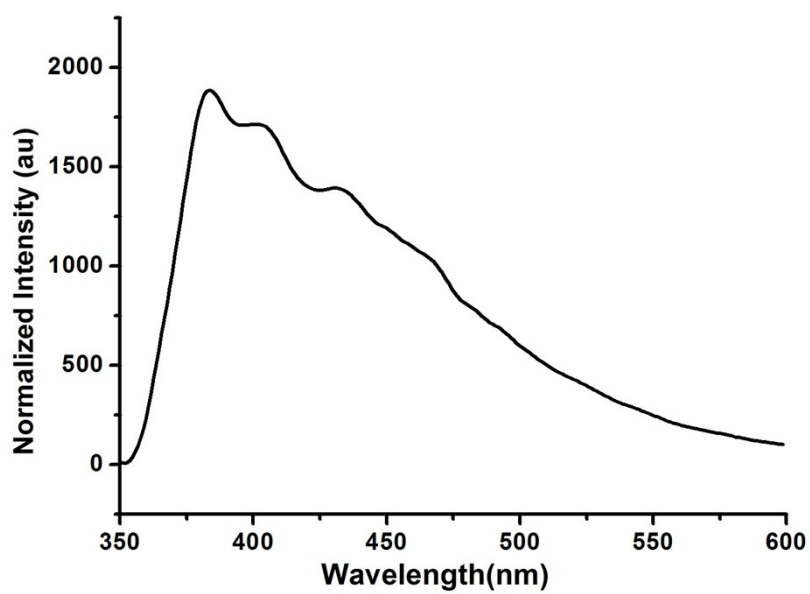

**Fig. S13** Emission spectra of the fma ligand.

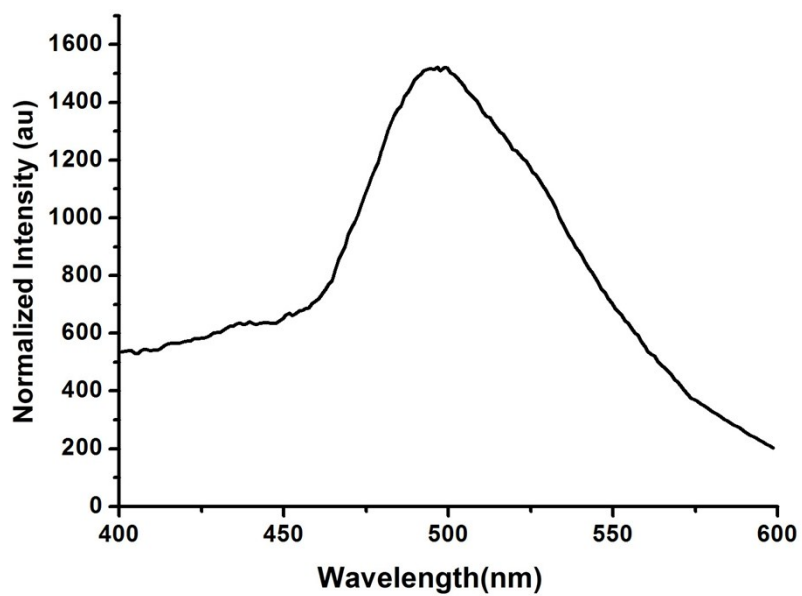

**Fig. S14** Emission spectra of the Br-bdc ligand.

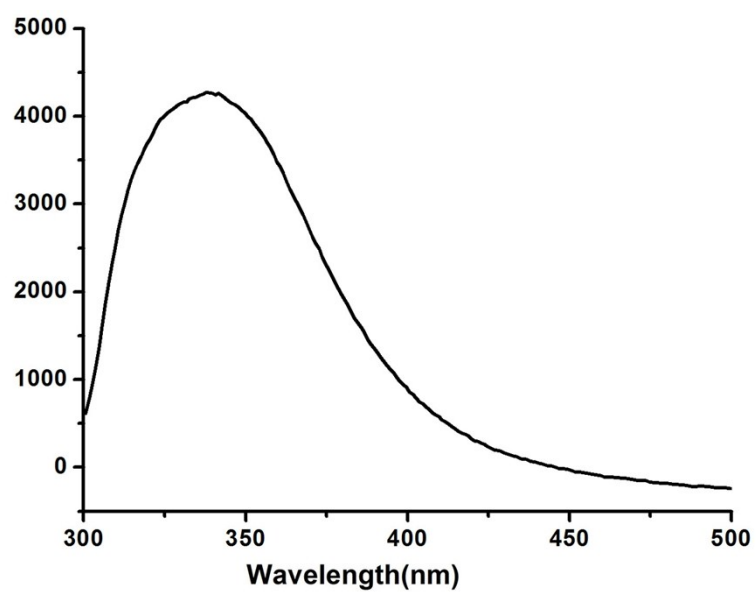

**Fig. S15** Emission spectra of the HL ligand.

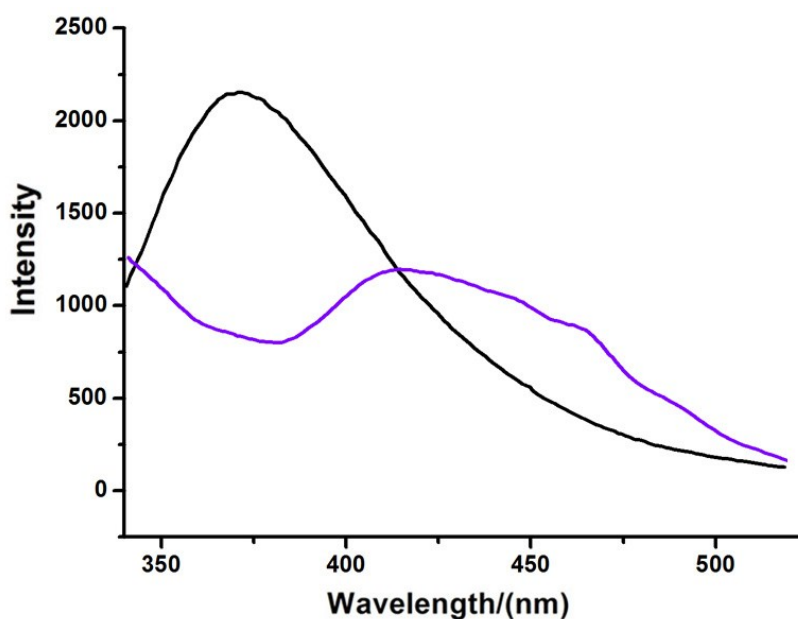

**Fig. S16** Luminescence spectra of the compound **1**(black) and **2** (purple) at room temperature.

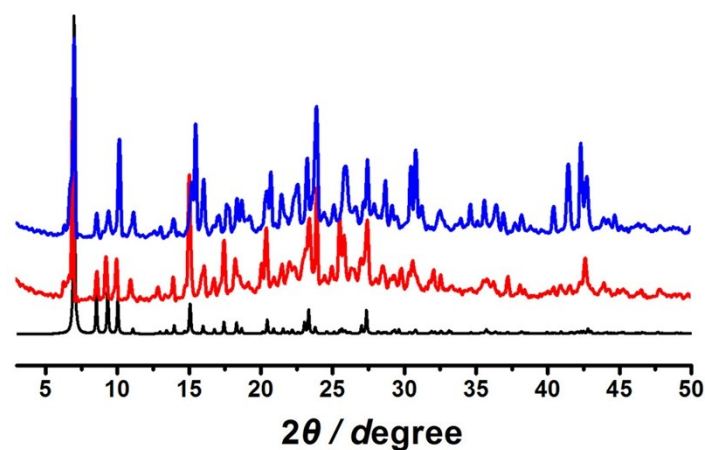

**Fig. S17** X-ray powder diffraction patterns of **1**: simulated (black), as-synthesized (red) and after 5 cycles of quenching NB (blue).

**Table S2** Selected bond lengths [Å] and angles [°] for **1**.

|              |          |                     |            |
|--------------|----------|---------------------|------------|
| Zn(1)-O(2)   | 1.955(3) | O(2)#1-Zn(1)-N(6)#2 | 120.10(14) |
| Zn(1)-O(2)#1 | 1.955(3) | O(2)-Zn(1)-N(6)#3   | 120.10(14) |
| Zn(1)-N(6)#2 | 2.001(4) | O(2)#1-Zn(1)-N(6)#3 | 111.03(14) |
| Zn(1)-N(6)#3 | 2.001(4) | N(6)#2-Zn(1)-N(6)#3 | 103.9(2)   |
| Zn(2)-O(4)#4 | 1.915(4) | O(4)#4-Zn(2)-O(1)   | 105.98(15) |

|                   |             |                     |            |
|-------------------|-------------|---------------------|------------|
| Zn(2)-O(1)        | 1.972(3)    | O(4)#4-Zn(2)-N(1)   | 122.03(18) |
| Zn(2)-N(1)        | 1.984(4)    | O(1)-Zn(2)-N(1)     | 101.96(15) |
| Zn(2)-N(3)#5      | 2.015(4)    | O(4)#4-Zn(2)-N(3)#5 | 118.16(18) |
| O(2)-Zn(1)-O(2)#1 | 91.47(18)   | O(1)-Zn(2)-N(3)#5   | 101.20(14) |
| O(2)-Zn(1)-N(6)#2 | 111.03 (14) | N(1)-Zn(2)-N(3)#5   | 104.37(16) |

**Table S3** Selected bond lengths [Å] and angles [°] for **2**.

|                   |            |                     |            |
|-------------------|------------|---------------------|------------|
| Zn(1)-O(2)        | 1.941(4)   | O(2)-Zn(1)-N(1)     | 95.30(17)  |
| Zn(1)-O(5)        | 1.988(3)   | O(5)-Zn(1)-N(1)     | 90.59(13)  |
| Zn(1)-N(1)        | 2.264(4)   | N(6)#1-Zn(1)-N(1)   | 90.09(15)  |
| Zn(1)-N(6)#1      | 2.028(4)   | O(2)-Zn(1)-N(4)#2   | 87.10(16)  |
| Zn(1)-N(4)#2      | 2.368(4)   | O(5)-Zn(1)-N(4)#2   | 88.79(12)  |
| Zn(2)-O(4)#3      | 2.083(4)   | N(1)-Zn(1)-N(4)#2   | 177.60(16) |
| Zn(2)-O(3)#4      | 2.096(4)   | O(4)#3-Zn(2)-O(3)#4 | 177.23(14) |
| Zn(2)-N(2)#5      | 2.112(4)   | O(4)#3-Zn(2)-N(2)#5 | 90.89(15)  |
| Zn(2)-N(3)        | 2.113(4)   | O(3)#4-Zn(2)-N(2)#5 | 87.61(16)  |
| Zn(2)-O(5)#6      | 2.134(3)   | O(4)#3-Zn(2)-N(3)   | 91.64(15)  |
| Zn(2)-O(5)#5      | 2.148(3)   | N(2)#5-Zn(2)-N(3)   | 177.42(16) |
| O(3)-Zn(2)#4      | 2.096(4)   | O(4)#3-Zn(2)-O(5)#6 | 94.37(14)  |
| O(2)-Zn(1)-O(5)   | 109.21(17) | O(3)#4-Zn(2)-O(5)#6 | 88.03(14)  |
| O(2)-Zn(1)-N(6)#1 | 129.71(18) | N(3)-Zn(2)-O(5)#6   | 87.92(14)  |
| O(5)-Zn(1)-N(6)#1 | 120.71(16) | O(5)#6-Zn(2)-O(5)#5 | 173.82(6)  |
